# Supplementary material for: A magnetorheological fluid based infinitely-regulatable triboelectric tactile sensor
Source: Royal Society of Chemistry journal article supplement (doi:10.1039/d4ta07129h), 2024-11-25
Supplement: d4ta07129h1.pdf [file d4ta07129h1.pdf]

# Supporting Information

## Magnetorheological fluid based infinitely-regulatable triboelectric tactile sensor

Xin Chong<sup>1</sup>, Zhenqiu Gao<sup>1</sup>, Zifan Jiang<sup>1</sup>, Ao Wang<sup>1</sup>, Jia Shi<sup>1</sup>, Lanyue Shen<sup>1</sup>, Zhen Wen<sup>1,\*</sup> and Xuhui Sun<sup>1,\*</sup>

<sup>1</sup> Institute of Functional Nano and Soft Materials (FUNSOM), Jiangsu Key Laboratory for Carbon-Based Functional Materials and Devices, Soochow University, Suzhou 215123, P.R. China.

\*Corresponding Authors: wenzhen2011@suda.edu.cn (Z. Wen); xhsun@suda.edu.cn (X. Sun).

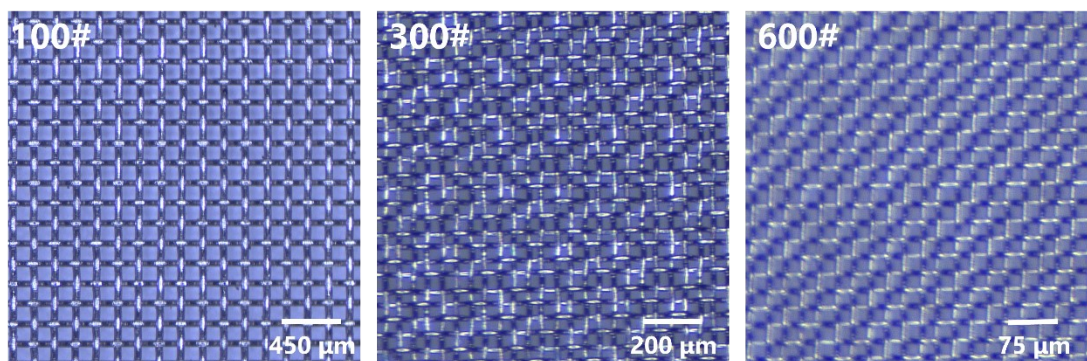

**Figure S1.** Optical images of the 100#, 300# and 600# wire meshes

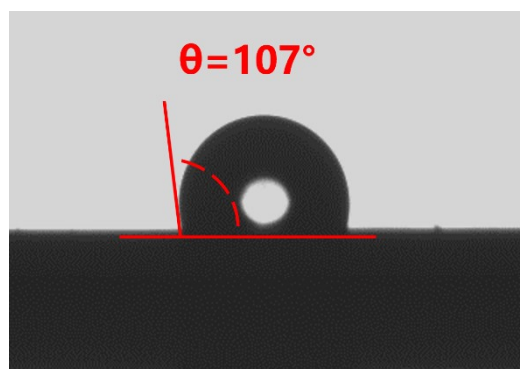

**Figure S2.** Water contact angle of raw silicone rubber.

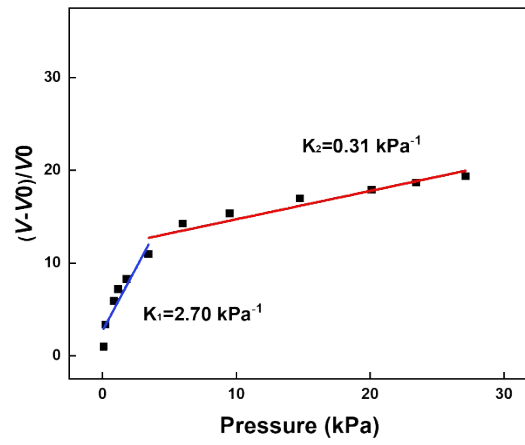

**Figure S3.** The relationship and linear fitting between the relative variations of voltage and pressure of MRF-TPS without microstructure.

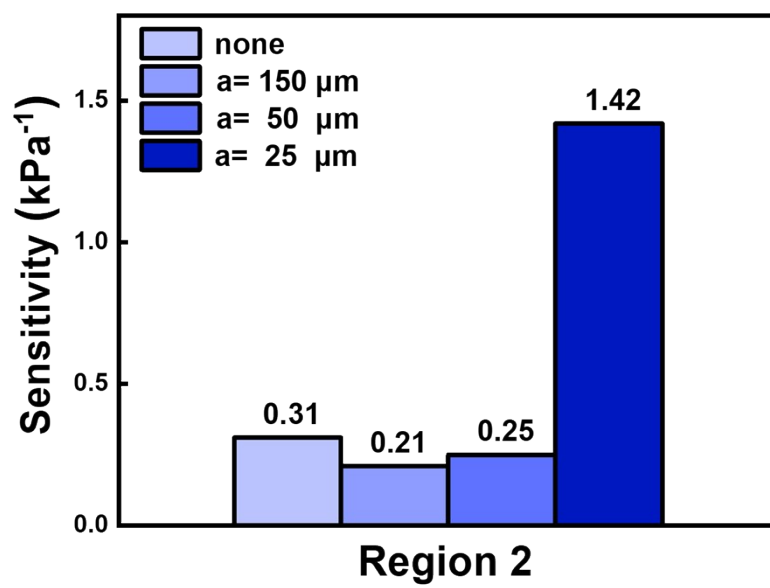

**Figure S4.** The summarized variation of sensitivity in high-pressure region of different MRF-TPSs.

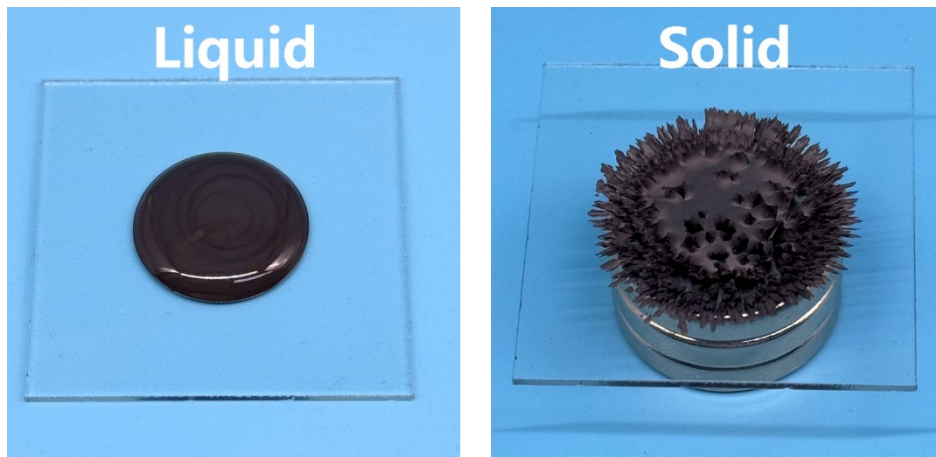

**Figure S5.** The optical images of magnetorheological fluid in different states.

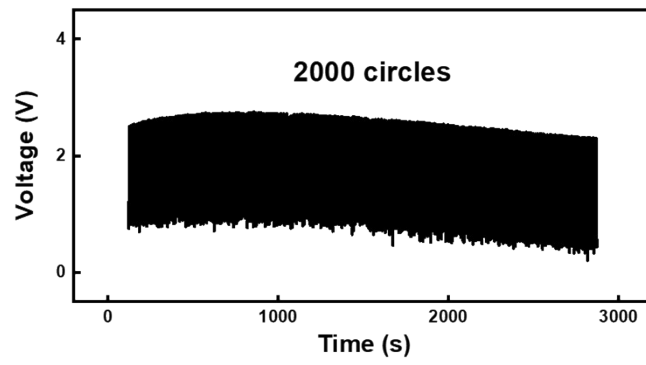

**Figure S6.** Periodic loading-unloading process of MRF-TPS in liquid-solid mode for 2000 cycles.

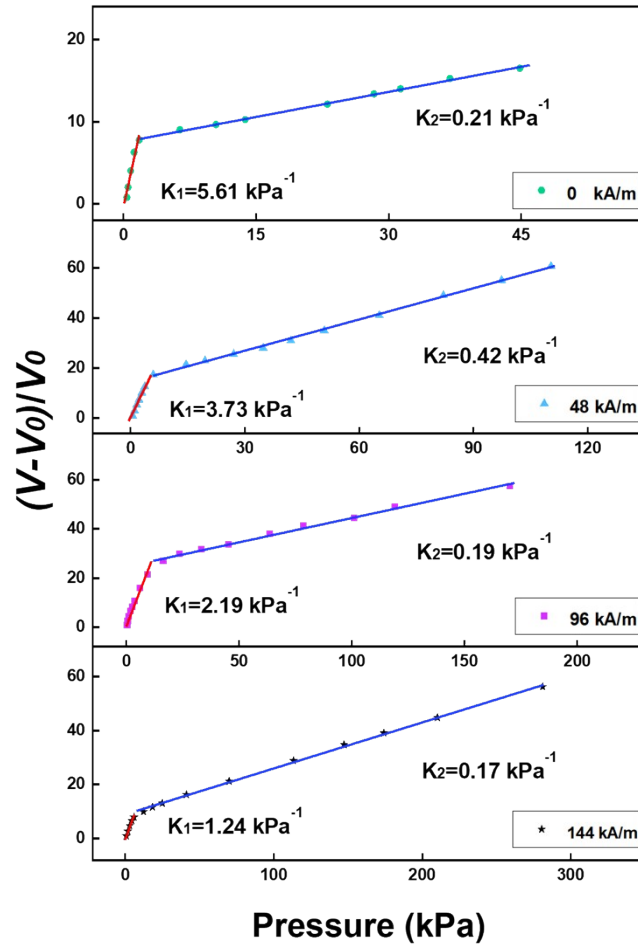

**Figure S7.** The relationship and linear fitting between the relative variations of voltage and pressure of 100#MRF-TPS under different magnet fields.



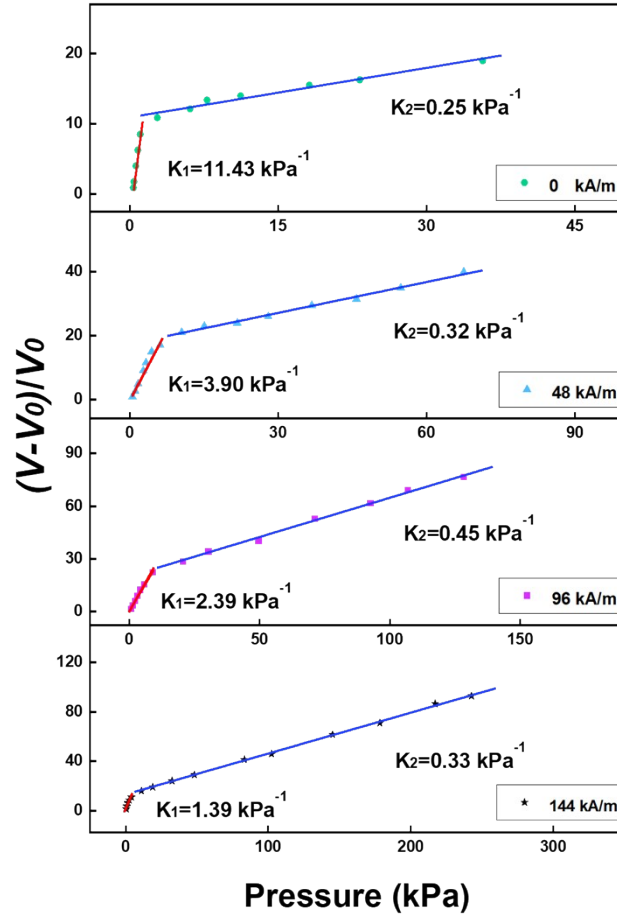

**Figure S8.** The relationship and linear fitting between the relative variations of voltage and pressure of 300#MRF-TPS under different magnet fields.

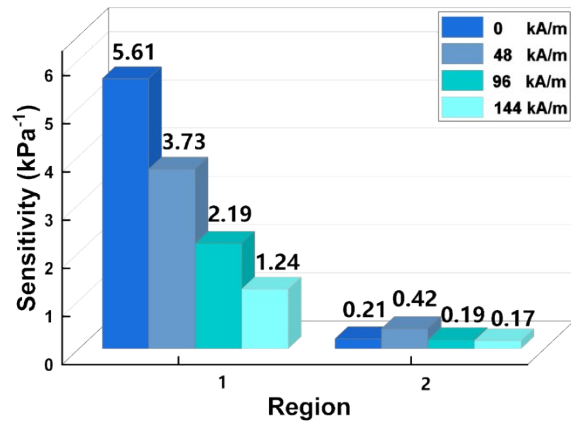

**Figure S9.** The summarized variation of sensitivity in two regions of 100#MRF-TPS under different magnet fields.

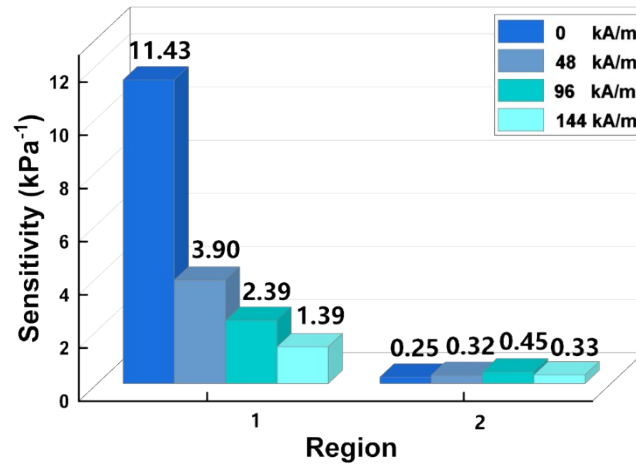

**Figure S10.** The summarized variation of sensitivity in two regions of 300#MRF-TPS under different magnet fields.
